1 **Exploring the potential genetic heterogeneity in the incidence of hoof and leg**  
2 **disorders in Austrian Fleckvieh and Braunvieh cattle**

3

4 Barbara Kosinska-Selbi<sup>1</sup>, Tomasz Suchocki<sup>1,2</sup>, Christa Egger-Danner<sup>3</sup>, Hermann  
5 Schwarzenbacher<sup>3</sup>, Magdalena Fraszczak<sup>1</sup> and Joanna Szyda<sup>1,2\*</sup>

6

7 <sup>1</sup> Biostatistic Group, Department of Genetics, Wrocław University of Environmental and Life  
8 Sciences, Kozuchowska 7, 51-631 Wrocław, Poland

9 <sup>2</sup> National Research Institute of Animal Production, Krakowska 1, 32-083 Balice, Poland

10 <sup>3</sup> ZuchtData EDV-Dienstleistungen GmbH, Dresdner Straße 89/19, 1200 Vienna, Austria

11

12 Corresponding author: [joanna.szyda@upwr.edu.pl](mailto:joanna.szyda@upwr.edu.pl)

13

## 14 **Abstract**

15 **Background:** Genetic heterogeneity denotes the situation when different genetic architectures  
16 underlying diverse populations result in the same phenotype. In this study, we explore the nature  
17 of differences in the incidence of the number of hoof and leg disorders between Braunvieh and  
18 Fleckvieh cattle in the context of genetic heterogeneity between the breeds.

19 **Results:** Despite potentially higher power of testing due to twice as large sample size, none of  
20 the SNPs was significantly associated with the number of hoof and leg disorders in Fleckvieh,  
21 while 16 SNPs were significant in Braunvieh. The most promising candidate genes in  
22 Braunvieh are: CBLB on BTA01, which causes arthritis in rats; CAV2 on BTA04, which in  
23 effects mouse skeletal muscles; PTHLH on BTA05, which causes disease phenotypes related  
24 to the skeleton in humans, mice and zebrafish; SORCS2 on BTA06, which causes decreased  
25 susceptibility to injury in the mouse. Some of the significant SNPs (BTA01, BTA04, BTA05,  
26 BTA13, BTA16) reveal allelic heterogeneity – i.e. differences due to different allele frequencies  
27 between Fleckvieh and Braunvieh. Some of the significant regions (BTA01, BTA05, BTA13,  
28 BTA16) correlate to inter-breed differences in LD structure and may thus represent false-  
29 positive heterogeneity. However, positions on BTA06 (SORCS2), BTA14 and BTA24 mark  
30 Braunvieh-specific regions.

31 **Conclusions:** We hypothesise that the observed genetic heterogeneity of hoof and leg disorders  
32 is a by-product of multigenerational differential selection of the breeds – towards dairy  
33 production in the case of Braunvieh and towards beef production in the case of Fleckvieh. Based  
34 on the current data set it is not possible to unequivocally confirm/exclude the hypothesis of  
35 genetic heterogeneity in the susceptibility to leg disorders between Fleckvieh and Braunvieh  
36 because only explore it through associations and not the causal mutations. Rationales against  
37 genetic heterogeneity comprise a limited power of detection of true associations as well as  
38 differences in the length of LD blocks and in linkage phase between breeds. On the other hand,  
39 multigenerational differential selection of the breeds and no systematic differences in LD  
40 structure between the breeds favour the heterogeneity hypothesis at some of the significant sites.

41

42 **Keywords:** Braunvieh, feet and leg disorders, Fleckvieh, genetic heterogeneity, GWAS,  
43 linkage disequilibrium, principal components

## 44 **Background**

45 Genetic heterogeneity denotes the situation when different genetic architectures underlying  
46 diverse populations result in the same phenotype. In human genetics, for decades, the concept  
47 of genetic heterogeneity has been considered in genome-wide association studies (GWAS) [1].  
48 One of the most well-known diseases characterised by high degree of genetic heterogeneity is  
49 the human autism spectrum disorder [2]. Relatively recently the concept of genetic  
50 heterogeneity has also been introduced into to the analysis of data from artificially selected  
51 plant and livestock species by Béréños et al. [3], de los Campos et al. [4], and Lehermeier et al.  
52 [5]. In such species, an important source of genetic heterogeneity may be due to a complex  
53 population structure, which is typically composed of divergently selected breeds exhibiting  
54 high variation in allele frequencies and linkage disequilibrium patterns [6].

55 Cattle hoof and leg disorders are relatively novel traits represented by a group of different  
56 phenotypes varying from binary, directly assessed disease diagnoses like e.g. a sole ulcer to  
57 composite traits scored on a categorical basis, e.g. a locomotion score. Due to their impact on  
58 welfare, productivity and fertility [7], the traits rapidly gain importance in dairy cattle breeding  
59 schemes. Technically, a common feature is a relatively poor definition of traits from this group  
60 and lack of routine recording, resulting in a large number of relatively small data sets scattered  
61 across various populations. Those features not only cause low power of detection of significant  
62 gene (or SNP) – phenotype associations resulting in a low reproducibility of results [7], but also  
63 imply a potential heterogeneity in the genetic determination of phenotypes due to differences  
64 in selection schemes and thus underlying differences in linkage disequilibrium and allele  
65 frequencies between populations [8].

66 In this study, we explore the nature of differences in the incidence of the number of hoof and  
67 leg disorders between Austrian bred Braunvieh and Fleckvieh cattle in the context of genetic  
68 heterogeneity between the breeds.

## 69 **Results**

### 70 **Heterogeneity in association signals**

71 Adapting the false discovery rate (FDR) threshold of 10%, despite potentially higher power of  
72 testing due to twice as large sample size, none of the SNPs was significantly associated with

73 the number of hoof and leg disorders in Fleckvieh, while 16 SNPs were significant in Braunvieh  
74 (Figure 1). One of the three significant SNPs from BTA01 is located 285,955 bp upstream of  
75 CBLB gene, known to cause arthritis in rats. The same SNP is located within a region of a QTL  
76 for hindquarter proportions. The two most significant SNPs were located on BTA04. Both were  
77 intergenic, but their closest downstream gene encodes caveolin 2 protein, which in the mouse  
78 is known to effect skeletal muscles. A SNP on BTA05 falls within four QTL regions responsible  
79 for rump conformation traits. One of the most interesting significant annotation points at  
80 another SNP on BTA05, which is located 76,362 bp downstream of PTHLH. In humans and  
81 mice, this gene causes multiple disease phenotypes related to the skeleton. In zebrafish  
82 mutations of this gene result in decreased bone mineralisation, in humans – to brachydactyly  
83 and to numerous bone and calcium related disease phenotypes in the mouse, including:  
84 decreased length of long bones, premature bone ossification, and increased osteocyte apoptosis.  
85 Another interesting significant annotation points at the intron of SORCS2 gene on BTA06,  
86 which was assigned to decreased susceptibility to injury phenotype in the mouse. The effect on  
87 muscles, albeit in Zebrafish, was assigned to the protein encoded by PIP4K2A, which is located  
88 close to the significant SNP on BTA13. The same SNP is also within a QTL region for rump  
89 angle. On BTA16, a significant association points out at ENSBTAG00000009943 involved in  
90 inflammatory response. Significant SNPs are summarised in Table 1 except a SNPs on BTA06,  
91 which could not be placed on the current reference assembly (ARS-UCD1.2).

92 There was no correlation between P values observed for SNPs in FLV and BSW, which was  
93 estimated to 0.00302 for all SNPs and -0.01494 (-0.08065) for SNPs with 100 smallest P values  
94 in BSW (FLV). In addition, breed-specific SNP effect estimates also revealed a very low  
95 correlation of 0.02363.

## 96 **Heterogeneity in genetic architecture**

97 For the chromosomes containing SNPs significant in Braunvieh, Machalanobis distances,  
98 expressing differences between breeds in SNP genotype variability, and the S statistics,  
99 expressing differences in the LD decay pattern, were visualised on Figure 2. For the  
100 Machalanobis distance, all FDR values at the significant SNP locations are equal to one. Even  
101 while considering whole chromosomes harbouring significant SNPs none of the distances was  
102 significant, indicating that it was not possible to differentiate between breeds based on SNP  
103 genotypes corresponding to the 50-SNP windows. A somewhat different picture emerged when  
104 inter-breed differences in LD were considered. In some, but not all, of the regions, significant

105 SNPs correspond to windows for which a difference in LD structure was indicated by high  
106 values of the *S* statistics - rs110488513 and rs41661497 on BTA01 as well as rs110792762 on  
107 BTA13. Some other significant SNPs are located in windows adjacent to such windows -  
108 rs110811919 on BTA1, as well as rs29024589, rs110843300, and rs41579631 on BTA16. For  
109 eight significant SNPs (rs29024589 on BTA01, both SNPs on BTA04, both SNPs on BTA05,  
110 both SNPs on BTA13, rs41579631 on BTA16) significant allelic heterogeneity was detected  
111 (Table 1).

112 Summarising the obtained results, inter-breed differences at some of the 16 significant  
113 positions can be explained by inter-breed differences in LD structure (BTA01, BTA05, BTA13  
114 and BTA16) indicated by high values of the *S* statistics and/or by significant allelic  
115 heterogeneity (BTA01, BTA04, BTA05, BTA13 and BTA16). Still polymorphisms on BTA06  
116 (marking SORCS2), BTA14 (marking TMEM74 and EMC2) and BTA24 (marking CCDC178  
117 and KLHL14) are good candidates for Braunvieh-specific associations.

## 118 **Discussion**

119 Although the number of published studies related to GWAS for hoof and leg disorders is very  
120 limited, their common feature is the lack of overlap in significant results both, between and  
121 even within the studies. Similarly, to our study, Wu et al. [9] applied the same GWAS model  
122 to feet and leg disorders in three breeds and depending on breed identified different significant  
123 regions between Danish Red and Danish Holstein, while no significance was observed in  
124 Jersey. In addition, earlier van der Spek et al. [10] found a very low overlap in significance  
125 while analysing a cow data set and a bull data set ascertained from the same population of  
126 Holstein-Friesian cattle, with only three SNPs in bulls overlapped with 94 SNPs significant for  
127 claw disorders in cows. Vargas et al. [11] found no overlap between significant regions defined  
128 for binary and categorical feet and leg classification scores in Nelore breed.

129 Also, in our study we observed no overlap in significance between Braunvieh and Fleckvieh.  
130 The potential basis of this phenomenon is either of a technical nature – type I/type II errors due  
131 to limited sample size, or of a genetic nature - genetic heterogeneity in the susceptibility to leg  
132 diseases between breeds. In humans, Coram et al. [12] reported a similar result regarding loci  
133 determining concentration of lipids in blood, where many differences between populations were  
134 due to allele frequencies at the candidate SNPs. The same study also points out at the presence  
135 of population-specific significant loci, which, as in our study, can be explained by population-

136 specific selection pressure. Another postulated cause of heterogeneity, see e.g. An and  
137 Claudianos [2], for their discussion on autism disorder), pointing out at different causal  
138 mutations within the common metabolic pathways. Similarly, Wu et al. [9] in the context of  
139 hoof and leg disorders in cattle hypothesised that the breed-specific significance hits represent  
140 relatively novel mutations, which occurred after breed separation. The third cause of  
141 heterogeneity are differences in genetic architecture between breeds, which are manifested by  
142 genome-wide (Figure 3), but also by local differences in LD, which were detected in our study  
143 within some of the regions harbouring SNPs significant in Braunvieh. Differences in LD  
144 patterns were considered in the context of heterogeneity detected between human populations  
145 [11].

## 146 **Conclusions**

147 Based on the current data set it is not possible to unequivocally confirm/exclude the hypothesis  
148 of genetic heterogeneity in the susceptibility to leg disorders between Fleckvieh and Braunvieh.  
149 The rationales against the hypothesis comprise: (i) limited power of detection of true  
150 associations if the effect size is not large and therefore high rate of spurious associations among  
151 detected SNPs, (ii) differences in the length of LD blocks, which imply differences in power of  
152 detecting the associations, (iii) differences in linkage phase between breeds, which may hamper  
153 the detection of causal sites in Fleckvieh or Braunvieh based on the available SNP panel. On  
154 the other hand (i) multigenerational differential selection of the breeds – towards dairy  
155 production in the case of Braunvieh and towards beef production in the case of Fleckvieh, (ii)  
156 no significant allelic heterogeneity, and (iii) no systematic differences in LD structure between  
157 the breeds stay in favour of the heterogeneity hypothesis at the significant sites on BTA06,  
158 BTA14, and BTA24.

159 Unfortunately, the data set available for the analysis comprises only common SNPs selected  
160 for a commercial microarray, so that we can explore only associations and not the causal  
161 mutations, therefore a final verification of the above hypothesis would require a denser SNP  
162 map from whole genome sequence.

## 163 **Methods**

### 164 **Dataset**

165 The analyzed data set was collected within the frame of the Efficient Cow project and comprised  
166 scores of hoof and leg disorders in Austrian 985 Braunvieh and 1,999 Fleckvieh cows. In  
167 particular, the analyzed phenotype comprised the total number of hoof disorders scored until  
168 100<sup>th</sup> day of lactation. In both breeds, the number of disorders varied between none and five,  
169 but the distributions differ with the fraction of diseased cows being higher in Fleckvieh (Figure  
170 1). The cows were genotyped with the GeneSeek<sup>®</sup> Genomic Profiler<sup>TM</sup> HD panel consisting  
171 of 76,934 SNPs out of which 74,762 SNPs remained for further analysis after preprocessing  
172 based on a minor allele frequency (<0.01) and a per-individual call rate (<99%).

### 173 **Genome-wide association study**

174 The genome-wide association study was performed separately for each breed by applying a  
175 series of single-SNP mixed linear models implemented in the GCTA software [13] for  
176 pseudophenotypes, expressed by cows' breeding values estimated by Suchocki et al. [14]. For  
177 a single SNP the model is given by:

$$178 \quad \mathbf{u} = \mu + \mathbf{X}\mathbf{b} + \mathbf{Z}\mathbf{g} + \mathbf{e} ,$$

179 where,  $\mathbf{u}$  is a vector of breeding values,  $\mu$  is a general mean,  $\mathbf{b}$  is the fixed additive effect of a  
180 single SNP,  $\mathbf{X}$  is a corresponding design matrix coded as 0, 1 or 2 for a homozygous,  
181 heterozygous and the other homozygous genotype respectively,  $\mathbf{g} \sim N(0, \mathbf{G}\sigma_g^2)$  is a random  
182 additive polygenic effect with the genomic covariance matrix between cows ( $\mathbf{G}$ ) calculated  
183 based on SNP genotypes,  $\mathbf{Z}$  is an incidence matrix for  $\mathbf{g}$ ,  $\mathbf{e} \sim N(0, \mathbf{I}\sigma_e^2)$  is a residual. The null  
184 hypothesis of  $\mathbf{b} = 0$  was tested using the Likelihood Ratio Test with the asymptotic large  
185 sample  $\chi_1^2$  distribution (as implemented into the GCTA). The resulting nominal P-values were  
186 transformed into False Discovery Rates [15] to account for multiple testing.

### 187 **Analysis of allelic heterogeneity**

188 For each, non-overlapping windows of 50 neighboring SNPs a genomic relationship matrices  
189 between cows were calculated, which were then decomposed into principal components, using  
190 the PCA subroutine implemented into GCTA [16]. Further on, for each of the windows,  
191 differences between the breeds in a 10-dimensional space defined by the first ten eigenvectors  
192 ( $\boldsymbol{\varepsilon}_1, \boldsymbol{\varepsilon}_2, \dots, \boldsymbol{\varepsilon}_{10}$ ) were quantified using the Mahalanobis distance:  $D_M = \sqrt{\mathbf{d}'\mathbf{V}^{-1}\mathbf{d}}$ . With  $\mathbf{d} =$   
193  $[\bar{\varepsilon}_{1B} - \bar{\varepsilon}_{1F}, \bar{\varepsilon}_{2B} - \bar{\varepsilon}_{2F}, \dots, \bar{\varepsilon}_{10B} - \bar{\varepsilon}_{10F}]$  containing differences between averaged eigenvectors  
194 for Braunvieh (subscript B) and Fleckvieh (subscript F) and  $\mathbf{V}$  representing a pooled covariance  
195 matrix of  $\boldsymbol{\varepsilon}_1$  and  $\boldsymbol{\varepsilon}_2$ . The Hotelling test:  $T = \frac{n_B n_F}{n_B + n_F} \cdot \frac{n_B + n_F - 11}{10(n_B + 2n_F - 2)} \cdot \mathbf{d}'\mathbf{V}^{-1}\mathbf{d} \sim F_{10, n_B + n_F - 11}$  was

196 used to test the null hypothesis of no differences in positions between Braunvieh and Fleckvieh,  
197 where  $n_x$  is the number of cows representing each breed [17].

198 The allelic heterogeneity between breeds was tested by calculating the ratio of minor allele  
199 frequencies in Fleckvieh ( $MAF_F$ ) and Braunvieh ( $MAF_B$ ) at significant SNP positions. For  
200 hypotheses testing, the large sample standard normal distribution of the natural logarithm of the  
201 ratio was used:  $\ln\left(\frac{MAF_F}{MAF_B}\right) \sim N(0,1)$ .

## 202 **Analysis of local linkage disequilibrium patterns**

203 Differences in linkage disequilibrium (LD) patterns between breeds were assessed based on the  
204 comparison of LD matrixes constructed for non-overlapping windows of 50 neighboring SNPs.  
205 LD between pairs of linked SNPs was quantified using Beagle 4.1 [18], separately for each  
206 breed, by the  $r^2$  coefficient given by  $\frac{(p_{11}p_{22}-p_{12}p_{21})^2}{p_{1.}(1-p_{1.})p_{.1}(1-p_{.1})}$ , with  $p_{ij}$  corresponding to the frequency  
207 of a two-SNP haplotype  $ij \in \{11,12,21,22\}$ ,  $p_{1.}$  and  $p_{.1}$  representing the marginal SNP allele  
208 frequency. Eigenvectors corresponding to the LD matrices were computed separately for each  
209 breed, using Python scripts. Inter-breed differences in local linkage disequilibrium were then  
210 quantified by:

$$211 \quad S = 2 \sum_{i=1}^{50} [(v_{iBB} - v_{iFB})^2 + (v_{iBF} - v_{iFF})^2] ,$$

212 where  $v_{ijk}$  corresponds the  $i$ -th element the 1<sup>st</sup> principal component vector calculated as the  
213 product of the LD matrix of the  $j$ -th breed (subscript B for BSW or subscript F for FLV) and  
214 the 1<sup>st</sup> eigenvector of the  $k$ -th breed. Following Garcia [19],  $S$  quantifies differences in the  
215 variability of LD between two populations. Furthermore, the genome-wide pattern of linkage  
216 disequilibrium (LD) decay with physical distance of pair-wise SNPs were binned into seven  
217 types of intervals (0 to 25 kb, 25 to 50 kb, 50 to 100 kb).

## 218 **List of abbreviations**

219 BSW: Braunvieh, FDR: false discovery rate, FLV: Fleckvieh, GWAS: genome-wide  
220 association study, LD: linkage disequilibrium, PCA: principal component analysis, SNP: single  
221 nucleotide polymorphism

## 222 **List of tables**

223 Table 1. SNPs significant in BSW, based on the  $FDR \leq 0.10$  threshold. SNP genomic  
224 information corresponds to the ARS-UCD1.2 reference genome.



## 225 **List of figures**

226 Figure 1. Manhattan plots for GWAS for hoof and leg disorders in Braunvieh and Fleckvieh.  
227 The horizontal line corresponds to FDR of 0.01.

228 Figure 2. Descriptive statistics of heterogeneity between Braunvieh and Fleckvieh on  
229 chromosomes containing SNPs significant for Braunvieh in GWAS. Vertical bars mark the  
230 positions of significant SNPs.

231 Figure 3. Genome-wide LD decay in Braunvieh and Fleckvieh.

## 232 **Availability of data and materials**

233 The data that support the findings of this study are available from the ZuchtData EDV-  
234 Dienstleistungen GmbH but restrictions apply to the availability of these data, which were used  
235 under license for the current study, and so are not publicly available. Data are however available  
236 from the authors upon reasonable request and with permission of the ZuchtData EDV-  
237 Dienstleistungen GmbH.

## 238 **Funding**

239 The research was supported by the Polish National Science Centre (NCN) grant No.  
240 2015/19/B/NZ9/03725. Data set was generated within the frame of the “Efficient Cow” project  
241 funded by the Austrian Federal Ministry of Agriculture, Forestry, Environment and Water  
242 Management, the Federations of Austrian Fleckvieh, Brown-Swiss, and Holstein, the  
243 Federation of Austrian Cattle Breeders and the Federal States of Austria. Genotyping was  
244 funded by the GENE2FARM project funded by FP7-KBBE (grant No 289592).

## 245 **Authors' contributions**

246 BKS edited data, performed GWAS and heterogeneity analysis. TS edited data and performed  
247 some statistical analyses. CEG contributed to writing of the manuscript. HS edited raw data and  
248 contributed to writing of the manuscript. MF calculated pairwise linkage disequilibrium. JS  
249 provided the concept of the study, performed some statistical analyses and significantly  
250 contributed to writing of the manuscript. All authors read and approved the final manuscript.

## 251 **Acknowledgements**

252 Computations were carried out at the Poznan Supercomputing and Networking Centre.

## 253 **References**

- 254 1. Lander ES, Schork NJ. Genetic dissection of complex traits. *Science*. 1994;265:2037–  
255 48.
- 256 2. An JY, Claudianos C. Genetic heterogeneity in autism: From single gene to a pathway  
257 perspective. *Neurosci Biobehav Rev*. 2016;68:442-53.  
258 <https://doi.org/10.1016/j.neubiorev.2016.06.013>.
- 259 3. Béréanos C, Ellis PA, Pilkington JG, Lee SH, Gratten J, Pemberton JM. Heterogeneity  
260 of genetic architecture of body size traits in a free-living population. *Mol Ecol*. 2015;  
261 24(8):1810-30. <https://doi.org/10.1111/mec.13146>.
- 262 4. de los Campos G, Veturi Y, Vazquez AI, Lehermeier C, Pérez-Rodríguez P.  
263 Incorporating Genetic Heterogeneity in Whole-Genome Regressions Using  
264 Interactions. *J Agric Biol Environ Stat*. 2015;20:467–90.  
265 <http://doi.org/10.1007/s13253-015-0222-5>.
- 266 5. Lehermeier C, Schön CC, de Los Campos G. Assessment of Genetic Heterogeneity in  
267 Structured Plant Populations Using Multivariate Whole-Genome Regression Models.  
268 *Genetics*. 2015;201:323–37. <http://doi.org/10.1534/genetics.115.177394>.
- 269 6. de los Campos G, Sorensen D. On the genomic analysis of data from structured  
270 populations. *J Anim Breed Genet*. 2014;131:163–64. Available from:  
271 <https://doi.org/10.1111/jbg.12091>.
- 272 7. Heringstad B, Egger-Danner C, Charfeddine N, Pryce JE, Stock KF, Kofler J, et al.  
273 Invited review: Genetics and claw health: Opportunities to enhance claw health by  
274 genetic selection. *J Dairy Sci*. 2018;10:4801–21. <http://doi.org/10.3168/jds.2017-13531>.
- 275  
276 8. Veturi Y, de Los Campos G, Yi N, Huang W, Vazquez AI, Kühnel B. Modeling  
277 Heterogeneity in the Genetic Architecture of Ethnically Diverse Groups Using  
278 Random Effect Interaction Models. *Genetics*. 2019;211:1395–407.  
279 <http://doi.org/10.1534/genetics.119.301909>.
- 280 9. Wu X, Guldbbrandtsen B, Lund MS, Sahana G. Association analysis for feet and legs  
281 disorders with whole-genome sequence variants in 3 dairy cattle breeds. *J Dairy Sci*.  
282 2016;99:7221–31. <http://doi.org/10.3168/jds.2015-10705>.

- 283 10. van der Spek D, van Arendonk JA, Bovenhuis H. Genome-wide association study for  
284 claw disorders and trimming status in dairy cattle. *J Dairy Sci.* 2015;98:1286–95.  
285 <http://doi.org/10.3168/jds.2014-8302>.
- 286 11. Vargas G, Neves HHR, Camargo GMF, Cardoso V, Munari DP, Carvalheiro R.  
287 Genome-wide association study and functional analysis of feet and leg conformation  
288 traits in Nellore cattle. *J Anim Sci.* 2018;96:1617–27.  
289 <http://doi.org/10.1093/jas/sky079>.
- 290 12. Coram MA, Duan Q, Hoffmann TJ, Thornton T, Knowles JW, Johnson NA, Ochs-  
291 Balcom HM, et al. Genome-wide characterization of shared and distinct genetic  
292 components that influence blood lipid levels in ethnically diverse human populations.  
293 *Am J Hum Genet.* 2013;92:904–16. <https://doi.org/10.1016/j.ajhg.2013.04.025>.
- 294 13. Yang J, Lee SH, Goddard ME, Visscher PM. GCTA: a tool for genome-wide complex  
295 trait analysis. *Am J Hum Genet.* 2011;88:76–82.  
296 <http://doi.org/10.1016/j.ajhg.2010.11.011>.
- 297 14. Suchocki T, Egger-Danner C, Schwarzenbacher H, Szyda J. Two-stage GWAS for the  
298 identification of causal variants underlying hoof disorders in cattle. *J Dairy Sci.*  
299 accepted.
- 300 15. Benjamini Y, Hochberg Y. Controlling the false discovery rate: a practical and  
301 powerful approach to multiple testing. *J Royal Stat Soc Ser B.* 1995;57:449–518.
- 302 16. Price AL, Patterson NJ, Plenge RM, Weinblatt ME, Shadick NA, Reich D. Principal  
303 components analysis corrects for stratification in genome-wide association studies.  
304 *Nat Genet.* 2006;38:904–9.
- 305 17. Goodpaster AM, Kennedy MA. Quantification and statistical significance analysis of  
306 group separation in NMR-based metabonomics studies. *Chemometr Intell Lab Syst.*  
307 2011;109:162–70. <http://doi.org/10.1016/j.chemolab.2011.08.009>.
- 308 18. Browning BL, Browning SR. Genotype Imputation with Millions of Reference  
309 Samples. *Am J Hum Genet.* 2016;98:116–26.  
310 <https://doi.org/10.1016/j.ajhg.2015.11.020>.
- 311 19. Garcia C. A simple procedure for the comparison of covariance matrices. *BMC Evol*  
312 *Biol.* 2012;12:222. <http://doi.org/10.1186/1471-2148-12-222>

313 Table 1 Summary of GWAS results.

| Position name                | Closest Gene(s)                                      | QTL                                               | Effect | Increasing allele | FDR – effect      | FDR – distance | S   | P – frequency ratio             |
|------------------------------|------------------------------------------------------|---------------------------------------------------|--------|-------------------|-------------------|----------------|-----|---------------------------------|
| 1:3,303,269<br>rs110488513   | Intergenic between<br>MIS18A and HUNK                |                                                   | 0.018  | A                 | 0.000008          |                | 1.0 | 0.163591<br>0.391039            |
| 1:43,542,488<br>rs41661497   | Intergenic between<br>DCBLD2 and COL8A1              |                                                   | 0.012  | G                 | 0.000106          |                | 1.0 | 0.152780<br>0.229225            |
| 1:50,767,507<br>rs110811919  | Intergenic upstream of<br>CBLB                       | Hindquarter proportions<br>(7124)                 | 0.007  | G                 | 0.015146          |                | 1.0 | 0.152780<br>0.007376            |
| 4:52,028,036<br>rs110514562  | Intergenic between<br>CAV2 and TES                   |                                                   | 0.029  | A                 | <10 <sup>-6</sup> |                | 1.0 | 0.002094<br><10 <sup>-7</sup>   |
| 4:52,079,221<br>rs137336750  | Intergenic between<br>CAV2 and TES                   |                                                   | 0.029  | G                 | <10 <sup>-6</sup> |                | 1.0 | 0.002094<br><10 <sup>-7</sup>   |
| 5:61,220,624<br>rs41590733   | Intergenic upstream of<br>NEDD1                      | Rump conformation<br>(3422, 3424, 1563,<br>20622) | 0.010  | A                 | 0.052989          |                | 1.0 | 0.005398<br>0.030671            |
| 5:81,769,685<br>rs109268584  | Intergenic between<br>CCDC91 and PTHLH               |                                                   | 0.008  | A                 | 0.043017          |                | 1.0 | 0.005398<br>0.008493            |
| 6:114,116,280<br>rs110962969 | Intron of<br>SORCS2                                  |                                                   | 0.010  | C                 | 0.002456          |                | 1.0 | 0.006265<br>0.381230            |
| 13:13,590,662<br>rs110792762 | Intergenic upstream of<br>CELF2                      |                                                   | 0.008  | G                 | 0.012588          |                | 1.0 | 0.451395<br>0.003215            |
| 13:23,590,146<br>rs110989397 | Intergenic between<br>SPAG6 and PIP4K2A              | Rump angle (3429)                                 | 0.019  | A                 | <10 <sup>-6</sup> |                | 1.0 | 0.006076<br>0.019040            |
| 14:55,768,446<br>rs110534995 | Intergenic between<br>TMEM74 and EMC2                |                                                   | 0.010  | A                 | 0.003962          |                | 1.0 | 0.023641<br>0.153087            |
| 16:12,125,227<br>rs29024589  | Intergenic between<br>CDC73 and GLRX2                |                                                   | 0.010  | T                 | 0.000676          |                | 1.0 | 0.021476<br>0.394140            |
| 16:12,280,122<br>rs110843300 | Intergenic upstream of<br>UCHL5                      |                                                   | 0.008  | G                 | 0.006398          |                | 1.0 | 0.021475<br>0.398872            |
| 16:36,037,389<br>rs41579631  | Intergenic between<br>RGS7 and<br>ENSBTAG00000009943 |                                                   | 0.007  | G                 | 0.000592          |                | 1.0 | 0.026922<br><10 <sup>-115</sup> |
| 24:24,273,191<br>rs136424124 | Intergenic between<br>CCDC178 and KLHL14             |                                                   | 0.002  | A                 | 0.082299          |                | 1.0 | 0.006277<br>0.111094            |

315 Figure 1 Manhattan plots for Braunvieh (BSW) and Fleckvieh (FLV). Red line marks down  
316 the significant level of 10 %.

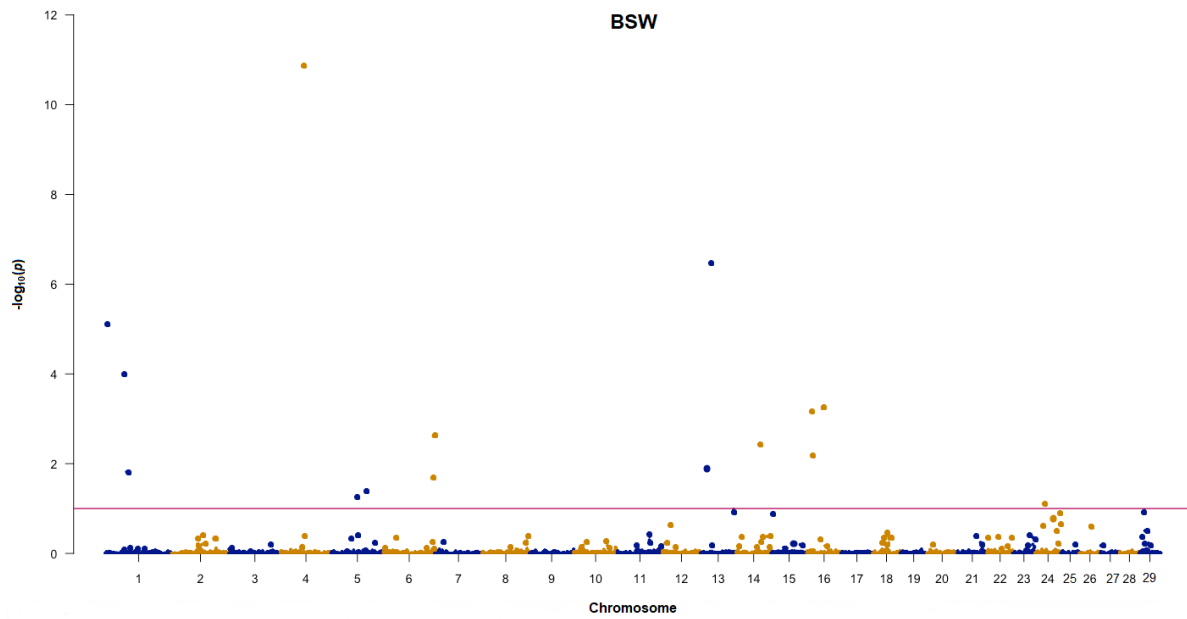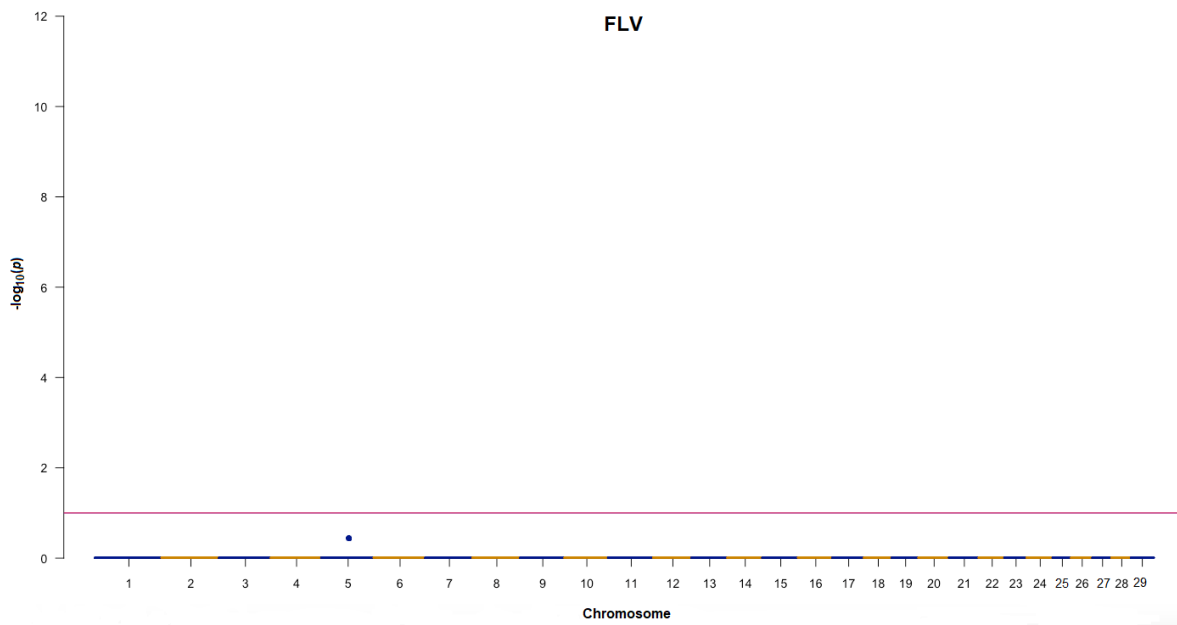

321 Figure 2 LD decay and Machalanobis distance for all chromosomes containing significant  
322 SNPs.

323

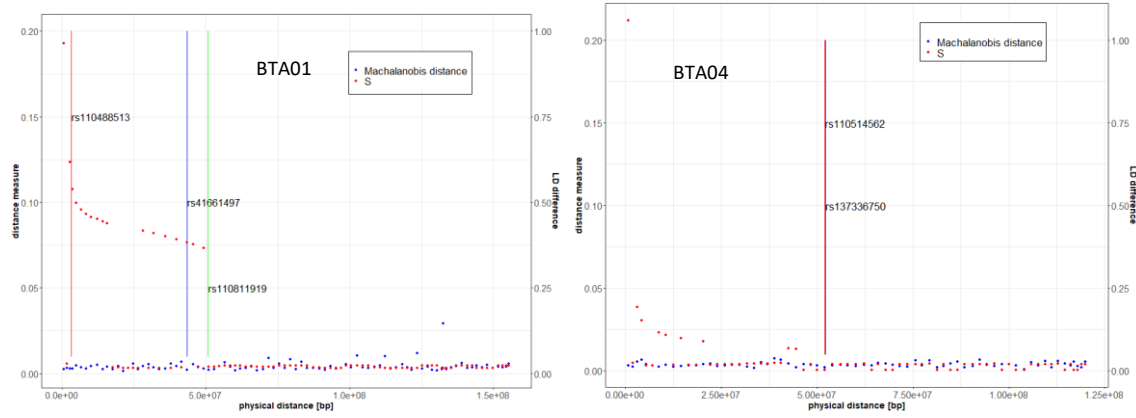

324

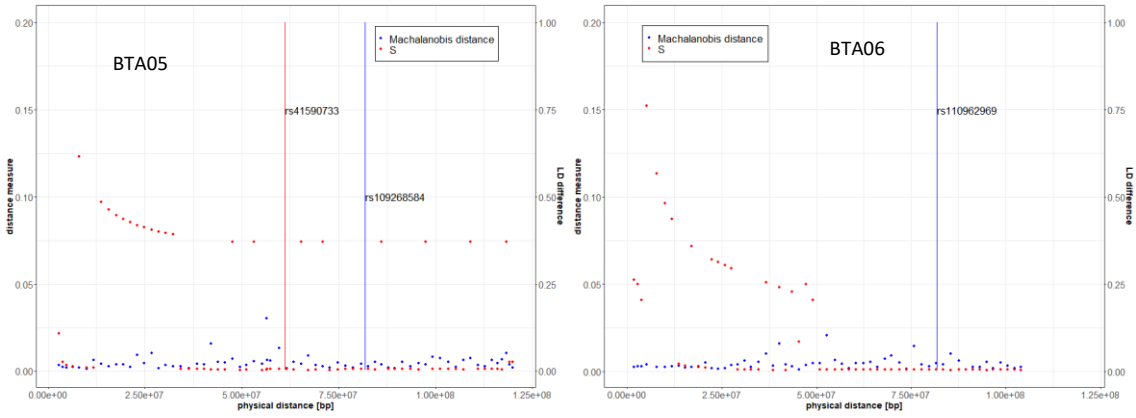

325

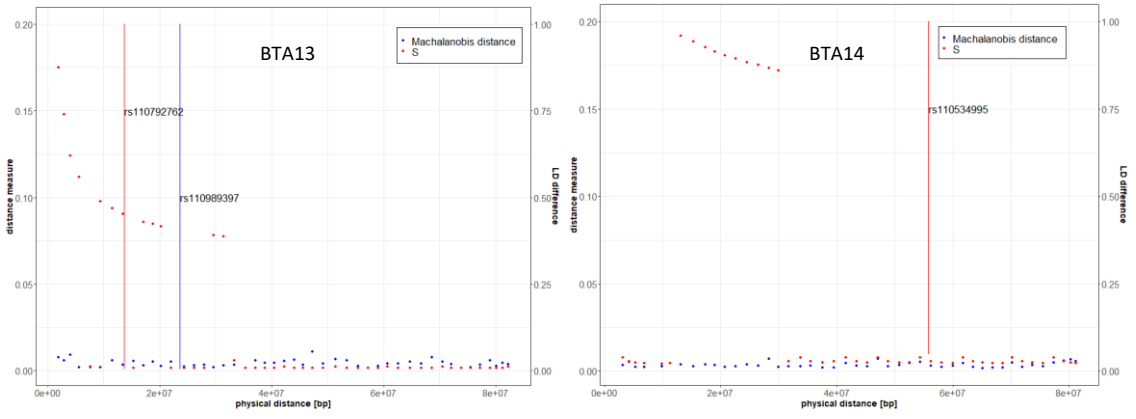

326

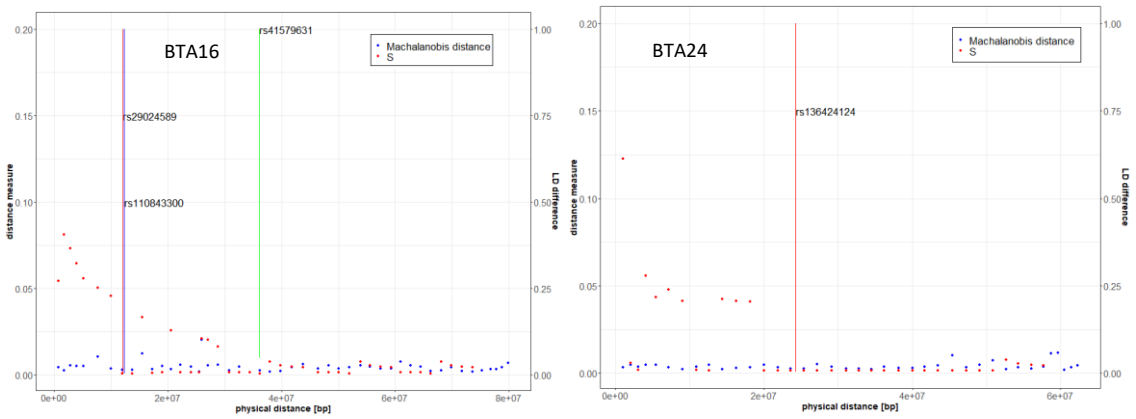

327 Figure 3 Differences in genetic architecture between breeds, expressed by LD patterns across  
328 the whole genome.

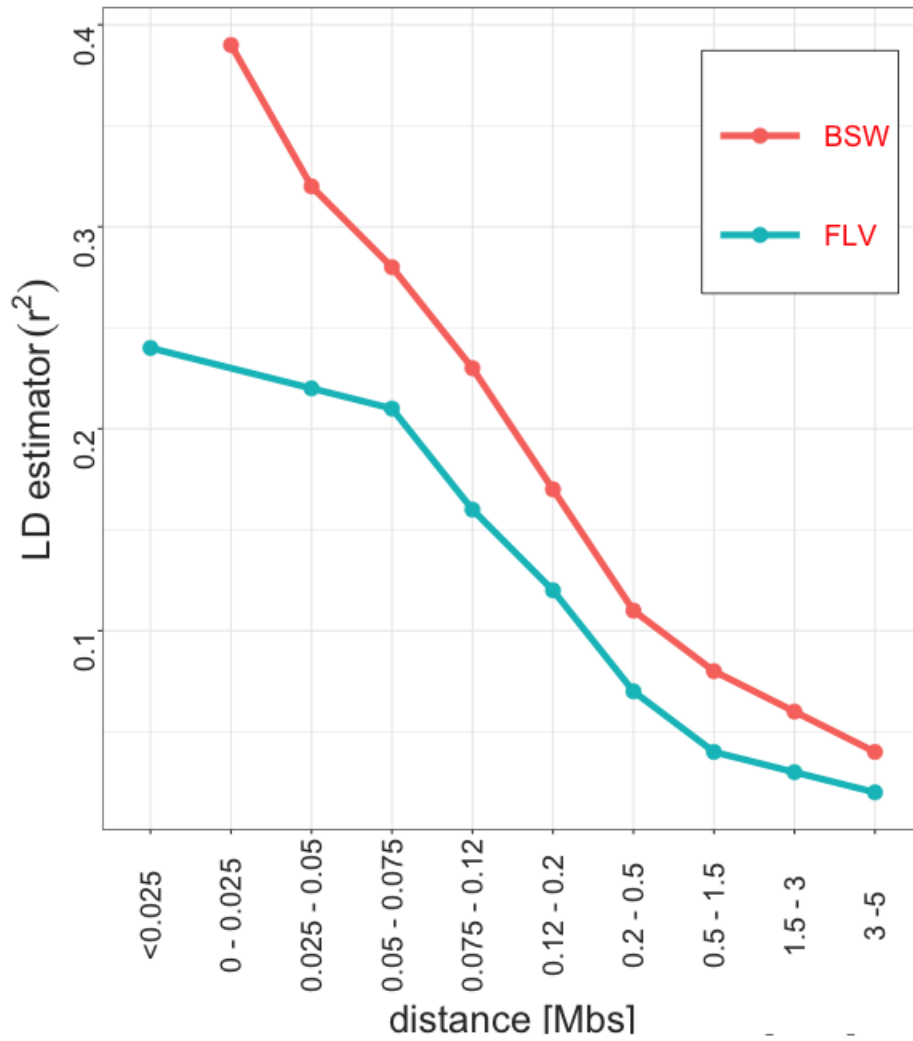

329
